# Supplementary material for: The Antioxidant Properties of Selected Varieties of Pumpkin Fortified with Iodine in the Form of Potassium Iodide and Potassium Iodate
Source: MDPI journal article supplement (doi:10.3390/foods12142792), 2023-07-23
Supplement: s1 [file s1]

Table S1. Iodine content [mg/100g] in selected varieties of pumpkin: Spaghetti (Sp), Delicata (DI), Butternut Squash (BtnS), Butterkin (Btk), Shishigatani (Ss), Butternut Orange (BtnO) and Muscat Provence (MsP), fortified with KIO<sub>3</sub>.

| Pumpkin Variation | Iodine Concentration (mg kg <sup>-1</sup> ) | Time of storage [days] |       |       |       |       |       |
|-------------------|---------------------------------------------|------------------------|-------|-------|-------|-------|-------|
|                   |                                             | 0                      | 60    | 120   | 180   | 240   | 320   |
| Sp                | 0.23                                        | 0.022                  | 0.020 | 0.019 | 0.018 | 0.017 | 0.017 |
|                   | 2.3                                         | 0.216                  | 0.206 | 0.195 | 0.184 | 0.175 | 0.170 |
|                   | 23.00                                       | 2.149                  | 2.043 | 1.944 | 1.840 | 1.751 | 1.681 |
| DI                | 0.23                                        | 0.022                  | 0.021 | 0.020 | 0.019 | 0.018 | 0.017 |
|                   | 2.3                                         | 0.219                  | 0.206 | 0.195 | 0.183 | 0.173 | 0.163 |
|                   | 23.00                                       | 2.186                  | 2.147 | 2.109 | 2.072 | 2.035 | 1.999 |
| BtnS              | 0.23                                        | 0.021                  | 0.021 | 0.021 | 0.020 | 0.020 | 0.019 |
|                   | 2.3                                         | 0.215                  | 0.211 | 0.208 | 0.204 | 0.201 | 0.197 |
|                   | 23.00                                       | 2.159                  | 2.124 | 2.089 | 2.055 | 2.021 | 1.988 |
| Btk               | 0.23                                        | 0.021                  | 0.021 | 0.021 | 0.020 | 0.020 | 0.020 |
|                   | 2.3                                         | 0.214                  | 0.211 | 0.207 | 0.204 | 0.201 | 0.197 |
|                   | 23.00                                       | 2.144                  | 2.101 | 2.059 | 2.017 | 1.977 | 1.937 |
| Ss                | 0.23                                        | 0.022                  | 0.021 | 0.021 | 0.020 | 0.020 | 0.020 |
|                   | 2.3                                         | 0.215                  | 0.212 | 0.209 | 0.206 | 0.204 | 0.201 |
|                   | 23.00                                       | 2.142                  | 2.110 | 2.080 | 2.049 | 2.019 | 1.990 |
| BtnOr             | 0.23                                        | 0.021                  | 0.021 | 0.021 | 0.020 | 0.020 | 0.020 |
|                   | 2.3                                         | 0.214                  | 0.211 | 0.209 | 0.206 | 0.203 | 0.201 |
|                   | 23.00                                       | 2.136                  | 2.108 | 2.081 | 2.054 | 2.027 | 2.000 |
| MsP               | 0.23                                        | 0.021                  | 0.021 | 0.020 | 0.020 | 0.019 | 0.018 |
|                   | 2.3                                         | 0.215                  | 0.212 | 0.205 | 0.196 | 0.190 | 0.179 |
|                   | 23.00                                       | 2.139                  | 2.087 | 2.047 | 1.963 | 1.889 | 1.778 |

Table S2. Iodine content [mg/100g] in selected varieties of pumpkin Spaghetti (Sp), Delicata (Dl), Butternut Squash (BtnS), Butterkin (Btk), Shishigatani (Ss), Butternut Orange (BtnO) and Muscat Provence (MsP), fortified with KI in concentration.

| Pumpkin Variation | Iodine Concentration<br>(mg kg <sup>-1</sup> ) | Time of storage [days] |       |       |       |       |       |
|-------------------|------------------------------------------------|------------------------|-------|-------|-------|-------|-------|
|                   |                                                | 0                      | 60    | 120   | 180   | 240   | 320   |
| Sp                | 0.23                                           | 0.020                  | 0.019 | 0.018 | 0.017 | 0.017 | 0.016 |
|                   | 2.3                                            | 0.200                  | 0.191 | 0.183 | 0.174 | 0.166 | 0.159 |
|                   | 23.00                                          | 2.024                  | 1.940 | 1.861 | 1.784 | 1.711 | 1.641 |
| Dl                | 0.23                                           | 0.021                  | 0.020 | 0.020 | 0.019 | 0.019 | 0.018 |
|                   | 2.3                                            | 0.206                  | 0.201 | 0.195 | 0.191 | 0.186 | 0.181 |
|                   | 23.00                                          | 2.061                  | 2.006 | 1.953 | 1.902 | 1.852 | 1.803 |
| BtnS              | 0.23                                           | 0.021                  | 0.020 | 0.020 | 0.019 | 0.019 | 0.018 |
|                   | 2.3                                            | 0.203                  | 0.198 | 0.194 | 0.189 | 0.185 | 0.180 |
|                   | 23.00                                          | 2.041                  | 1.982 | 1.925 | 1.870 | 1.816 | 1.764 |
| Btk               | 0.23                                           | 0.019                  | 0.019 | 0.019 | 0.019 | 0.018 | 0.018 |
|                   | 2.3                                            | 0.196                  | 0.192 | 0.189 | 0.186 | 0.183 | 0.180 |
|                   | 23.00                                          | 1.955                  | 1.916 | 1.877 | 1.840 | 1.803 | 1.766 |
| Ss                | 0.23                                           | 0.020                  | 0.020 | 0.019 | 0.019 | 0.018 | 0.018 |
|                   | 2.3                                            | 0.202                  | 0.196 | 0.191 | 0.186 | 0.181 | 0.177 |
|                   | 23.00                                          | 2.024                  | 1.968 | 1.913 | 1.861 | 1.809 | 1.759 |
| BtnOr             | 0.23                                           | 0.020                  | 0.020 | 0.019 | 0.019 | 0.018 | 0.018 |
|                   | 2.3                                            | 0.202                  | 0.197 | 0.191 | 0.185 | 0.180 | 0.175 |
|                   | 23.00                                          | 2.024                  | 1.963 | 1.905 | 1.849 | 1.794 | 1.740 |
| MsP               | 0.23                                           | 0.020                  | 0.019 | 0.019 | 0.018 | 0.018 | 0.017 |
|                   | 2.3                                            | 0.203                  | 0.197 | 0.191 | 0.186 | 0.180 | 0.151 |
|                   | 23.00                                          | 2.011                  | 1.957 | 1.904 | 1.853 | 1.804 | 1.755 |

Table S3. The ABTS<sup>•+</sup> of selected varieties of pumpkin: Spaghetti (Sp), Delicata (DI), Butternut Squash (BtnS), Butterkin (Btk), Shishigatani (Ss), Butternut Orange (BtnO) and Muscat Provence (MsP), fortified with iodine KI and KIO<sub>3</sub> (mg Trolox/100 g dm).

|       |                       | Iodine Concentration<br>(mg kg <sup>-1</sup> ) | KIO <sub>3</sub> | KI     |
|-------|-----------------------|------------------------------------------------|------------------|--------|
| Sp    | after drying          | 0.00                                           | 122.30           | 122.30 |
|       |                       | 0.23                                           | 121.91           | 121.63 |
|       |                       | 2.30                                           | 123.80           | 123.80 |
|       |                       | 23.00                                          | 114.02           | 122.34 |
|       | after 320 day storage | 0.00                                           | 55.72            | 56.33  |
|       |                       | 0.23                                           | 55.77            | 56.23  |
|       |                       | 2.30                                           | 54.77            | 55.77  |
|       |                       | 23.00                                          | 44.02            | 55.18  |
| DI    | after drying          | 0.00                                           | 149.30           | 149.30 |
|       |                       | 0.23                                           | 149.84           | 150.32 |
|       |                       | 2.30                                           | 148.78           | 149.14 |
|       |                       | 23.00                                          | 134.55           | 142.18 |
|       | after 320 day storage | 0.00                                           | 65.87            | 67.23  |
|       |                       | 0.23                                           | 65.71            | 66.04  |
|       |                       | 2.30                                           | 65.87            | 64.63  |
|       |                       | 23.00                                          | 53.72            | 60.06  |
| BtnS  | after drying          | 0.00                                           | 119.30           | 119.30 |
|       |                       | 0.23                                           | 118.41           | 121.66 |
|       |                       | 2.30                                           | 120.77           | 119.57 |
|       |                       | 23.00                                          | 110.19           | 119.72 |
|       | after 320 day storage | 0.00                                           | 52.77            | 53.66  |
|       |                       | 0.23                                           | 52.92            | 53.16  |
|       |                       | 2.30                                           | 51.44            | 52.47  |
|       |                       | 23.00                                          | 42.05            | 48.90  |
| Btk   | after drying          | 0.00                                           | 128.36           | 128.36 |
|       |                       | 0.23                                           | 127.40           | 130.90 |
|       |                       | 2.30                                           | 127.40           | 128.66 |
|       |                       | 23.00                                          | 114.56           | 122.19 |
|       | after 320 day storage | 0.00                                           | 56.77            | 57.74  |
|       |                       | 0.23                                           | 56.94            | 57.20  |
|       |                       | 2.30                                           | 55.35            | 56.45  |
|       |                       | 23.00                                          | 43.68            | 51.74  |
| Ss    | after drying          | 0.00                                           | 132.24           | 132.24 |
|       |                       | 0.23                                           | 132.28           | 132.09 |
|       |                       | 2.30                                           | 133.87           | 132.84 |
|       |                       | 23.00                                          | 120.64           | 131.95 |
|       | after 320 day storage | 0.00                                           | 59.81            | 59.55  |
|       |                       | 0.23                                           | 59.10            | 59.67  |
|       |                       | 2.30                                           | 58.70            | 58.23  |
|       |                       | 23.00                                          | 46.63            | 57.02  |
| BtnOr | after drying          | 0.00                                           | 109.25           | 109.25 |
|       |                       | 0.23                                           | 109.27           | 109.52 |
|       |                       | 2.30                                           | 109.57           | 111.82 |
|       |                       | 23.00                                          | 100.49           | 109.25 |
|       | after 320 day storage | 0.00                                           | 48.46            | 49.02  |
|       |                       | 0.23                                           | 48.68            | 49.13  |
|       |                       | 2.30                                           | 48.05            | 48.34  |
|       |                       | 23.00                                          | 38.74            | 40.78  |
| MsP   | after drying          | 0.00                                           | 99.36            | 99.36  |
|       |                       | 0.23                                           | 100.05           | 102.59 |
|       |                       | 2.30                                           | 99.72            | 99.68  |
|       |                       | 23.00                                          | 90.40            | 99.61  |
|       | after 320 day storage | 0.00                                           | 44.69            | 43.95  |
|       |                       | 0.23                                           | 44.24            | 44.08  |
|       |                       | 2.30                                           | 44.11            | 43.84  |
|       |                       | 23.00                                          | 44.11            | 43.84  |

|  |  |       |       |       |
|--|--|-------|-------|-------|
|  |  | 23.00 | 35.80 | 39.72 |
|--|--|-------|-------|-------|

Tables S4. The DPPH• of selected varieties of pumpkin: Spaghetti (Sp), Delicata (DI), Butternut Squash (BtnS), Butterkin (Btk), Shishigatani (Ss), Butternut Orange (BtnO) and Muscat Provence (MsP), fortified with iodine KI and KIO<sub>3</sub> (mg Trolox/100 g dm).

|       |                       | Iodine Concentration<br>(mg kg <sup>-1</sup> ) | KIO <sub>3</sub> | KI     |
|-------|-----------------------|------------------------------------------------|------------------|--------|
| Sp    | after drying          | 0.00                                           | 129.36           | 129.36 |
|       |                       | 0.23                                           | 129.62           | 130.03 |
|       |                       | 2.30                                           | 128.83           | 130.98 |
|       |                       | 23.00                                          | 122.87           | 129.33 |
|       | after 320 day storage | 0.00                                           | 57.63            | 57.63  |
|       |                       | 0.23                                           | 58.19            | 58.37  |
|       |                       | 2.30                                           | 56.39            | 58.25  |
|       |                       | 23.00                                          | 48.13            | 58.87  |
| DI    | after drying          | 0.00                                           | 155.11           | 155.11 |
|       |                       | 0.23                                           | 155.50           | 155.31 |
|       |                       | 2.30                                           | 154.94           | 154.55 |
|       |                       | 23.00                                          | 141.51           | 149.26 |
|       | after 320 day storage | 0.00                                           | 68.61            | 68.61  |
|       |                       | 0.23                                           | 68.29            | 68.70  |
|       |                       | 2.30                                           | 65.16            | 68.61  |
|       |                       | 23.00                                          | 57.75            | 62.09  |
| BtnS  | after drying          | 0.00                                           | 146.32           | 146.32 |
|       |                       | 0.23                                           | 145.52           | 146.66 |
|       |                       | 2.30                                           | 146.66           | 145.68 |
|       |                       | 23.00                                          | 137.72           | 146.29 |
|       | after 320 day storage | 0.00                                           | 65.89            | 65.89  |
|       |                       | 0.23                                           | 66.02            | 65.89  |
|       |                       | 2.30                                           | 66.27            | 64.81  |
|       |                       | 23.00                                          | 51.40            | 63.74  |
| Btk   | after drying          | 0.00                                           | 69.78            | 69.78  |
|       |                       | 0.23                                           | 71.34            | 69.94  |
|       |                       | 2.30                                           | 69.80            | 69.63  |
|       |                       | 23.00                                          | 64.18            | 67.21  |
|       | after 320 day storage | 0.00                                           | 30.79            | 30.79  |
|       |                       | 0.23                                           | 30.91            | 31.02  |
|       |                       | 2.30                                           | 30.72            | 30.85  |
|       |                       | 23.00                                          | 23.23            | 27.93  |
| Ss    | after drying          | 0.00                                           | 147.25           | 147.25 |
|       |                       | 0.23                                           | 150.53           | 147.59 |
|       |                       | 2.30                                           | 147.29           | 146.93 |
|       |                       | 23.00                                          | 135.65           | 147.26 |
|       | after 320 day storage | 0.00                                           | 66.60            | 66.60  |
|       |                       | 0.23                                           | 65.81            | 66.44  |
|       |                       | 2.30                                           | 65.36            | 64.83  |
|       |                       | 23.00                                          | 53.00            | 66.23  |
| BtnOr | after drying          | 0.00                                           | 150.00           | 150.00 |
|       |                       | 0.23                                           | 149.34           | 149.03 |
|       |                       | 2.30                                           | 152.34           | 150.35 |
|       |                       | 23.00                                          | 138.47           | 150.02 |
|       | after 320 day storage | 0.00                                           | 67.01            | 67.01  |
|       |                       | 0.23                                           | 66.38            | 67.55  |
|       |                       | 2.30                                           | 65.51            | 67.47  |
|       |                       | 23.00                                          | 52.80            | 66.77  |
| MsP   | after drying          | 0.00                                           | 92.36            | 92.36  |
|       |                       | 0.23                                           | 92.39            | 91.77  |
|       |                       | 2.30                                           | 92.39            | 92.59  |
|       |                       | 23.00                                          | 85.29            | 91.95  |

|  |                       |       |       |       |
|--|-----------------------|-------|-------|-------|
|  | after 320 day storage | 0 .00 | 40.62 | 40.62 |
|  |                       | 0.23  | 40.23 | 40.65 |
|  |                       | 2.30  | 39.12 | 40.66 |
|  |                       | 23.00 | 32.22 | 39.91 |
